# Supplementary material for: Probing the effects of heterogeneity on delocalized π⋯π interaction energies
Source: Royal Society of Chemistry journal article supplement (doi:10.1039/b718720c), 2008-01-01
Supplement: b718720c.pdf [file b718720c.pdf]

Supplementary information (ESI) for Phys. Chem. Chem. Phys.  
This journal is (c) the Owner Societies 2008

This file contains Cartesian coordinates for Di, Cy, Di/Di,  
Cy/Cy, Di/Cy, Tz/Tz and Tz/Bz optimized at the MP2/DZP++  
level of theory.

Di

|   |            |            |             |
|---|------------|------------|-------------|
| C | 0.00000000 | 0.00000000 | 0.69232000  |
| C | 0.00000000 | 0.00000000 | -0.69232000 |
| C | 0.00000000 | 0.00000000 | 1.92741600  |
| C | 0.00000000 | 0.00000000 | -1.92741600 |
| H | 0.00000000 | 0.00000000 | 2.99804000  |
| H | 0.00000000 | 0.00000000 | -2.99804000 |

Cy

|   |               |              |              |
|---|---------------|--------------|--------------|
| C | 0.6956842407  | 0.0000000000 | 0.0000000000 |
| C | -0.6956842407 | 0.0000000000 | 0.0000000000 |
| N | 1.8886357750  | 0.0000000000 | 0.0000000000 |
| N | -1.8886357750 | 0.0000000000 | 0.0000000000 |

Di/Di

|   |             |             |            |
|---|-------------|-------------|------------|
| C | -0.07341700 | 1.71353300  | 0.00000000 |
| C | 1.28546800  | 1.97312200  | 0.00000000 |
| C | -1.28546800 | 1.47389300  | 0.00000000 |
| C | 2.49902300  | 2.20666500  | 0.00000000 |
| C | -1.28546800 | -1.97312200 | 0.00000000 |
| C | 0.07341700  | -1.71353300 | 0.00000000 |
| C | -2.49902300 | -2.20666500 | 0.00000000 |
| C | 1.28546800  | -1.47389300 | 0.00000000 |
| H | -3.54650500 | -2.42846400 | 0.00000000 |
| H | 2.33475100  | -1.26177000 | 0.00000000 |
| H | -2.33475100 | 1.26177000  | 0.00000000 |
| H | 3.54650500  | 2.42846400  | 0.00000000 |

Cy/Cy

|   |               |               |              |
|---|---------------|---------------|--------------|
| C | 0.5483608130  | 1.6645431609  | 0.0000000000 |
| C | 1.9350277751  | 1.7733567164  | 0.0000000000 |
| C | -1.9350277751 | -1.7733567164 | 0.0000000000 |
| C | -0.5483608130 | -1.6645431609 | 0.0000000000 |
| N | -3.1235996933 | -1.8777924126 | 0.0000000000 |
| N | 0.6407287091  | -1.5665637536 | 0.0000000000 |
| N | 3.1235996933  | 1.8777924126  | 0.0000000000 |
| N | -0.6407287091 | 1.5665637536  | 0.0000000000 |

Di/Cy

|   |           |           |          |
|---|-----------|-----------|----------|
| C | -1.383366 | -1.580150 | 0.000000 |
| N | -2.573189 | -1.493566 | 0.000000 |
| C | 0.002845  | -1.693951 | 0.000000 |
| N | 1.190764  | -1.811095 | 0.000000 |
| C | 1.382396  | 1.623708  | 0.000000 |
| C | 0.000000  | 1.675455  | 0.000000 |
| C | 2.616316  | 1.566959  | 0.000000 |
| H | 3.685989  | 1.517225  | 0.000000 |
| C | -1.235427 | 1.716304  | 0.000000 |
| H | -2.305595 | 1.765452  | 0.000000 |

Tz/Tz

|   |           |           |           |
|---|-----------|-----------|-----------|
| N | 0.850330  | -1.353190 | 1.198482  |
| C | 1.353946  | -1.005975 | 0.000000  |
| N | 0.850330  | -1.353190 | -1.198482 |
| C | -0.249243 | -2.127167 | -1.128067 |
| N | -0.846117 | -2.551023 | 0.000000  |
| C | -0.249243 | -2.127167 | 1.128067  |
| H | 2.250018  | -0.385068 | 0.000000  |
| H | -0.694242 | -2.441657 | -2.072074 |
| H | -0.694242 | -2.441657 | 2.072074  |

|   |           |          |           |
|---|-----------|----------|-----------|
| N | 0.262672  | 2.175871 | 1.199399  |
| C | 0.744699  | 2.550363 | 0.000000  |
| N | 0.262672  | 2.175871 | -1.199399 |
| C | -0.800105 | 1.354622 | -1.129453 |
| N | -1.380139 | 0.906607 | 0.000000  |
| C | -0.800105 | 1.354622 | 1.129453  |
| H | 1.599336  | 3.226856 | 0.000000  |
| H | -1.229407 | 1.019556 | -2.073363 |
| H | -1.229407 | 1.019556 | 2.073363  |

Bz/Tz

|   |           |           |           |
|---|-----------|-----------|-----------|
| C | -2.081902 | 1.625544  | 0.000000  |
| C | -1.379620 | 1.615231  | 1.216715  |
| C | 0.025611  | 1.592334  | 1.217341  |
| C | 0.727415  | 1.579430  | 0.000000  |
| C | 0.025611  | 1.592334  | -1.217341 |
| C | -1.379620 | 1.615231  | -1.216715 |
| H | -3.171530 | 1.641508  | 0.000000  |
| H | -1.925060 | 1.627641  | 2.160472  |
| H | 0.572313  | 1.582802  | 2.160365  |
| H | 1.817218  | 1.565443  | 0.000000  |
| H | 0.572313  | 1.582802  | -2.160365 |
| H | -1.925060 | 1.627641  | -2.160472 |
| N | -0.707486 | -1.600571 | 0.000000  |
| C | 0.025611  | -1.594167 | -1.127298 |
| N | 1.369439  | -1.605811 | -1.198632 |
| C | 1.979752  | -1.618456 | 0.000000  |
| N | 1.369439  | -1.605811 | 1.198632  |
| C | 0.025611  | -1.594167 | 1.127298  |
| H | -0.520159 | -1.587030 | -2.070512 |
| H | 3.069569  | -1.648315 | 0.000000  |
| H | -0.520159 | -1.587030 | 2.070512  |
